# Supplementary material
Source: Springer Nature journal article supplement (https://www.springermedizin.de/resource/supplementary/13049_2010_262_MOESM1_ESM.PDF/9666218)
Supplement: MOESM1 [file 9666218]

# Prehospital advanced airway management in the Central Region of Denmark

Leif Rognås, Troels Martin Hansen

1. Are you a specialist in anaesthesiology? ☐ No  
☐ Yes
2. How many years of experience in anaesthesiology do you have? \_\_\_\_\_ years
3. How many years of prehospital experience do you have? \_\_\_\_\_ years
4. How many percent of your work do you spend prehospital? \_\_\_\_\_ %
5. In which of these courses have you taken part?  
☐ PHTLS  
☐ ATLS  
☐ EPLS  
☐ ALS  
☐ SSAI Course in advanced airway management  
☐ Airway management course during residency  
☐ Other \_\_\_\_\_
6. Have you taken part in any airway management course during the last four years?? ☐ No  
☐ Yes  
If yes, what course / courses? \_\_\_\_\_  
\_\_\_\_\_
7. How many endotracheal intubations do you perform on average pr. month? In-hospital: \_\_\_\_\_ Prehospital: \_\_\_\_\_
8. Do you feel that there is a minimum requirement for endotracheal intubations pr. month necessary to maintain this skill? ☐ No  
☐ Yes  
\_\_\_\_\_  
\_\_\_\_\_  
**If yeas – how many?** \_\_\_\_\_  
**If no – why not?** \_\_\_\_\_
9. Have you ever experienced a difficult prehospital endotracheal intubation? ☐ No  
☐ Yes  
(Definition: >2 intubation attempts **or** >2 minutes used **or** Cormac – Lehan Score  $\geq 3$  **or** intubation of the oesophagus)  
☐ Trauma  
☐ Cardiac arrest  
☐ Respiratory failure  
☐ Child  
☐ Other \_\_\_\_\_  
**If yes – in what type of patient / patients?** \_\_\_\_\_

10. Have you ever had to give up on a prehospital endotracheal intubation?

**If yes – how did you solve the problem?**

**If yes – in what type of patient / patients?**

- ☐ No
- ☐ Yes – problem solved by bag-valve-mask ventilation
- ☐ Yes – problem solved with a supraglottic device
- ☐ Yes – problem solved with a transtracheal airway
- ☐ Yes – problem solved in another way
- ☐ Yes – and the problem could not be solved prehospital
  
- ☐ Trauma
- ☐ Cardiac arrest
- ☐ Respiratory failure
- ☐ Child
- ☐ Other \_\_\_\_\_

11. Are you aware of any prehospital deaths related to airway management in your prehospital program?

- ☐ No
- ☐ Yes

12. What type of airway management equipment is available in your prehospital program?

**Supraglottic devices**

- ☐ Laryngeal masks (LMA)
- ☐ LMA Proseal
- ☐ I-Gel
- ☐ Intubating laryngeal mask (ILMA / Fasttrach)
- ☐ Larynx tube
- ☐ Combitube
- ☐ Other \_\_\_\_\_

**Intubation aids**

- ☐ McCoy laryngoscope
- ☐ Gum-Elastic-Bougie
- ☐ AirTraq
- ☐ Other \_\_\_\_\_

**Transtracheal devices**

- ☐ Equipment for transtracheal needle oxygenation
- ☐ Equipment for establishing a surgical airway
- ☐ Other \_\_\_\_\_

☐ Don't know

13. Which of these airway devices have you received any form of education or training in using?

**Supraglottic devices**

- ☐ Laryngeal masks (LMA)
- ☐ LMA Proseal
- ☐ I-Gel
- ☐ Intubating laryngeal mask (ILMA / Fasttrach)
- ☐ Larynx tube
- ☐ Combitube
- ☐ Other \_\_\_\_\_

**Intubation aids**

- ☐ McCoy laryngoscope
- ☐ Gum-Elastic-Bougie
- ☐ AirTraq
- ☐ Other \_\_\_\_\_

**Transtracheal devices**

- ☐ Equipment for transtracheal needle oxygenation
- ☐ Equipment for establishing a surgical airway
- ☐ Other \_\_\_\_\_
- ☐ None of the above

14. What's your clinical experience in the use of the following airway devices?

**Laryngeal mask (LMA)**

- ☐ None
- ☐ Minor clinical experience
- ☐ Some clinical experience
- ☐ Considerable clinical experience

**LMA Proseal**

- ☐ None
- ☐ Minor clinical experience
- ☐ Some clinical experience
- ☐ Considerable clinical experience

**I-Gel**

- ☐ None
- ☐ Minor clinical experience
- ☐ Some clinical experience
- ☐ Considerable clinical experience

**Intubating Laryngeal mask (ILMA / Fasttrach)**

- ☐ None
- ☐ Minor clinical experience
- ☐ Some clinical experience
- ☐ Considerable clinical experience

**Larynx tube**

- ☐ None
- ☐ Minor clinical experience
- ☐ Some clinical experience
- ☐ Considerable clinical experience

**Combitube**

- ☐ None
- ☐ Minor clinical experience
- ☐ Some clinical experience
- ☐ Considerable clinical experience

**McCoy laryngoscope**

- ☐ None
- ☐ Minor clinical experience
- ☐ Some clinical experience
- ☐ Considerable clinical experience

**Gum – Elastic - Bougie**

- ☐ None
- ☐ Minor clinical experience
- ☐ Some clinical experience
- ☐ Considerable clinical experience

**AirTraq**

- ☐ None
- ☐ Minor clinical experience
- ☐ Some clinical experience
- ☐ Considerable clinical experience

**Equipment for transtracheal needle oxygenation**

- ☐ None
- ☐ Minor clinical experience
- ☐ Some clinical experience
- ☐ Considerable clinical experience

**Equipment for establishing a surgical airway**

- ☐ None
- ☐ Minor clinical experience
- ☐ Some clinical experience
- ☐ Considerable clinical experience

**Other**

- ☐ None
- ☐ Minor clinical experience
- ☐ Some clinical experience
- ☐ Considerable clinical experience

15. What is your preferred airway management device in a “Can ventilate – can’t intubate”-situation?

**Supraglottic devices**

- ☐ Bag-valve-mask
- ☐ Laryngeal masks (LMA)
- ☐ LMA Proseal
- ☐ I-Gel
- ☐ Intubating laryngeal mask (ILMA / Fasttrach)
- ☐ Larynx tube
- ☐ Combitube
- ☐ Other \_\_\_\_\_

**Intubation aids**

- ☐ McCoy laryngoscope
- ☐ Gum-Elastic-Bougie
- ☐ AirTraq
- ☐ Other \_\_\_\_\_

**Transtracheal devices**

- ☐ Equipment for transtracheal needle oxygenation
- ☐ Equipment for establishing a surgical airway
- ☐ Other \_\_\_\_\_

16. What is your preferred airway management device in a “Can’t ventilate – can’t intubate”-situation?

**Supraglottic devices**

- ☐ Laryngeal masks (LMA)
- ☐ LMA Proseal
- ☐ I-Gel
- ☐ Intubating laryngeal mask (ILMA / Fasttrach)
- ☐ Larynx tube
- ☐ Combitube
- ☐ Other \_\_\_\_\_

**Intubation aids**

- ☐ McCoy laryngoscope
- ☐ Gum-Elastic-Bougie
- ☐ AirTraq
- ☐ Other \_\_\_\_\_

**Transtracheal devices**

- ☐ Equipment for transtracheal needle oxygenation
- ☐ Equipment for establishing a surgical airway
- ☐ Other \_\_\_\_\_

17. How do you maintain your airway management skills?

- ☐ Regularly clinical work
- ☐ Mannequin training
- ☐ Training on cadavers
- ☐ Simulations
- ☐ Airway management courses
- ☐ Other \_\_\_\_\_
- ☐ None of the above

18. Does your prehospital program carry out prehospital airway management education and -training on a regular basis?

- ☐ No
- ☐ Yes
- ☐ Don't know

19. Does your prehospital program have written guidelines for prehospital airway management?

- ☐ No
- ☐ Yes, national / international guidelines are implemented
- ☐ Yes there are local, specific guidelines for prehospital airway management
- ☐ Don't know
